# Supplementary material
Source: Springer Nature journal article supplement (https://www.springermedizin.de/resource/supplementary/12916_2014_991_MOESM4_ESM.pdf/9598766)

**A**

THP-1

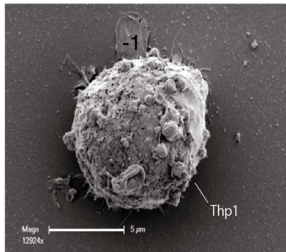

THP-1 and merozoite

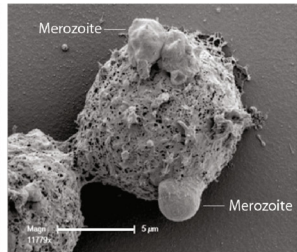

THP-1 and merozoite

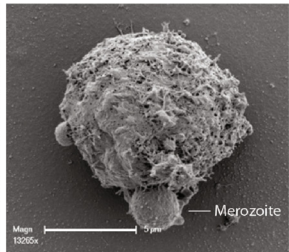**B**

DIC

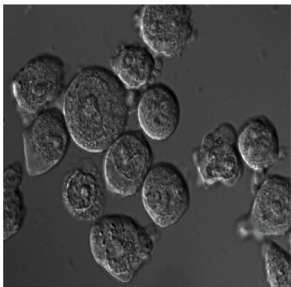

Hoechst

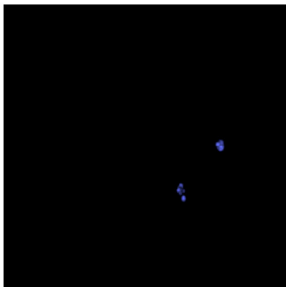

Merge

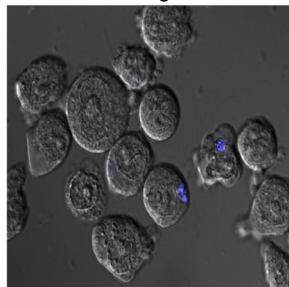

Supplement: MOESM4 [file 9598766]
